# Supplementary figures and images for: Copper Death Inducer, FDX1, as a Prognostic Biomarker Reshaping Tumor Immunity in Clear Cell Renal Cell Carcinoma
Source: MDPI journal article supplement (doi:10.3390/cells12030349), 2023-01-17

Figure S1

A

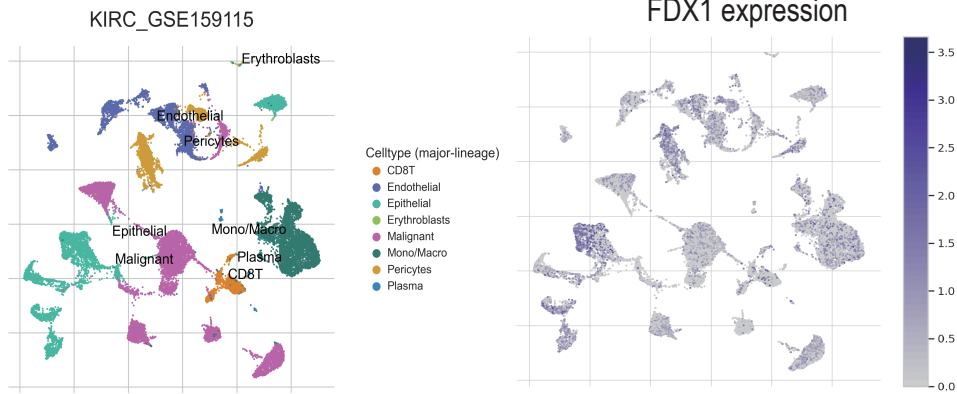

B

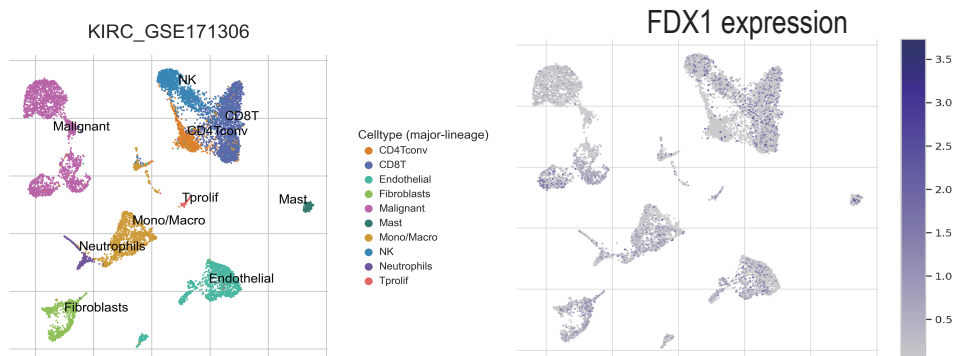

Supplement: s1 [file s1]
